# Supplementary material for: Predictors for severe persisting pain in rheumatoid arthritis are associated with pain origin and appraisal of pain
Source: HighWire-hosted journal article supplement (doi:10.1136/ard-2023-225414), 2024-05-30
Supplement: ard-2023-225414supp003_data_supplement.pdf [file ard-2023-225414supp003_data_supplement.pdf]

**Supplementary Table 3. Variables with highest factor loadings identified by Varimax factor analysis and subsequent decision regarding variable inclusion**

|          | Variable                                                                                                                                                                          | Highest loading | Reasons for decision deviating from statistical output    |
|----------|-----------------------------------------------------------------------------------------------------------------------------------------------------------------------------------|-----------------|-----------------------------------------------------------|
| Factor1  | Pain Catastrophizing Scale (PCS)                                                                                                                                                  | x               |                                                           |
| Factor2  | RAID: Pain item                                                                                                                                                                   | x               |                                                           |
| Factor3  | Healthcare Assessment Questionnaire – Disability Index (HAQ-DI)                                                                                                                   |                 | score instead of single item                              |
| Factor4  |                                                                                                                                                                                   |                 | HAQ single item not chosen due to Factor3                 |
| Factor5  | Patient Health Questionnaire-9 Score (PHQ-9)                                                                                                                                      | x               |                                                           |
| Factor6  | painDETECT Score (PD-Q)                                                                                                                                                           |                 | score instead of single item                              |
| Factor7  | PHQ: Difficulty falling asleep or staying asleep through the night, or increased sleep [Not at all/On individual days/On more than half of the days/Almost every day]             | x               |                                                           |
| Factor8  | Tender joint count                                                                                                                                                                | x               |                                                           |
| Factor9  | Current disease activity                                                                                                                                                          |                 | assessment of VAS in cm is much more complex              |
| Factor10 |                                                                                                                                                                                   |                 | painDETECT single item not chosen due to Factor6          |
| Factor11 | painDETECT: pain duration [persistent pain with slight fluctuations/persistent pain with pain attacks/pain attacks without pain between them/pain attacks with pain between them] | x               | unchanged because PD-Q Score does not load on this factor |
| Factor12 | DMARDs categories [no DMARDs/csDMARD/bDMARD/tsDMARD]                                                                                                                              | x               |                                                           |
| Factor13 | Adjunctive pharmacological medication [yes/no]                                                                                                                                    | x               |                                                           |
| Factor14 | RBS: Tension pain                                                                                                                                                                 | x               |                                                           |
| Factor15 | Seropositivity [yes/no/unknown]                                                                                                                                                   | x               |                                                           |
